# Supplementary material for: Perturbation of the ground-state electronic structure of FMN by the conserved cysteine in phototropin LOV2 domains
Source: Royal Society of Chemistry journal article supplement (doi:10.1039/b810040c), 2008-01-01
Supplement: b810040c.pdf [file b810040c.pdf]

Supporting informations.

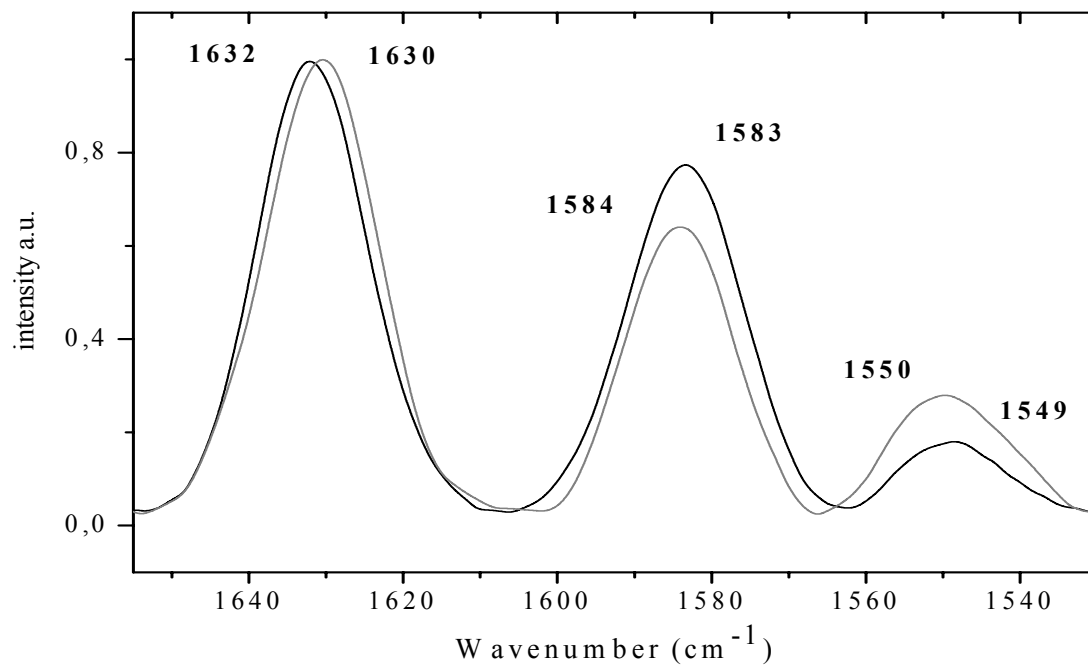

Figure S1: RR data smoothed of AsLOV2wt (black solid line) and AsLOV2-C450A (grey solid line) showing the same difference as in FLN spectra with however a lower sensitivity.

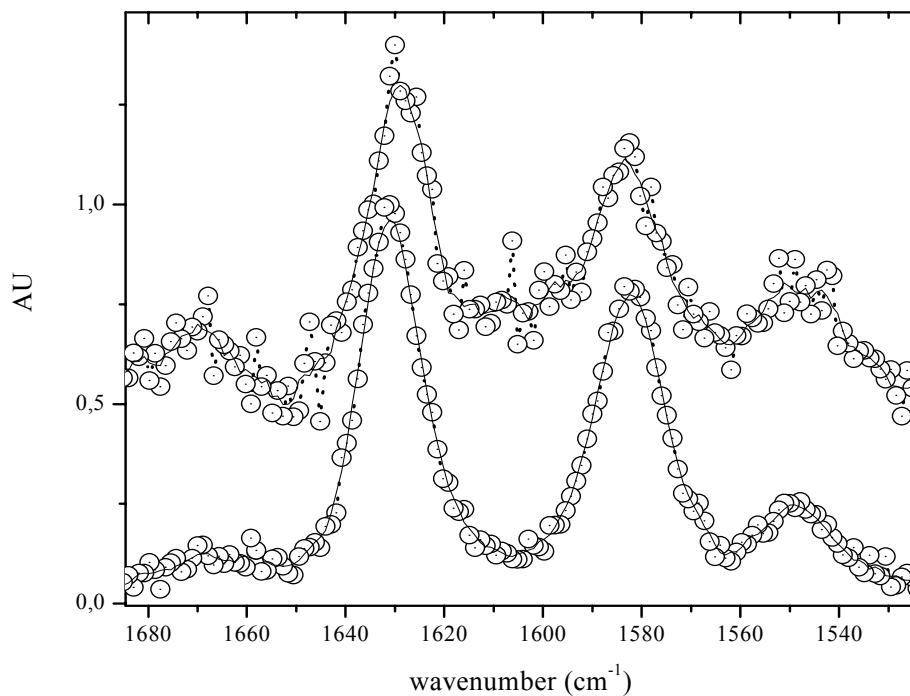

Figure S2: same as figure S1 with raw un-smoothed data points showing the low signal to noise ratio of AsLOV2-C450A RR spectrum (top). This latter is more fluorescent (unquenched) than AsLOV2wt (bottom) which increases the background during RR collection.
